# Supplementary material for: In situ electrochemical-ATR-FTIR spectroscopic studies on solution phase carboxylate radical anionsElectronic supplementary information (ESI) available: first derivative EPR spectra of radical anions. See http://www.rsc.org/suppdata/p2/b2/b206087f/
Source: Royal Society of Chemistry journal article supplement (doi:10.1039/b206087f), 2002-10-14
Supplement: b206087f.pdf [file b206087f.pdf]

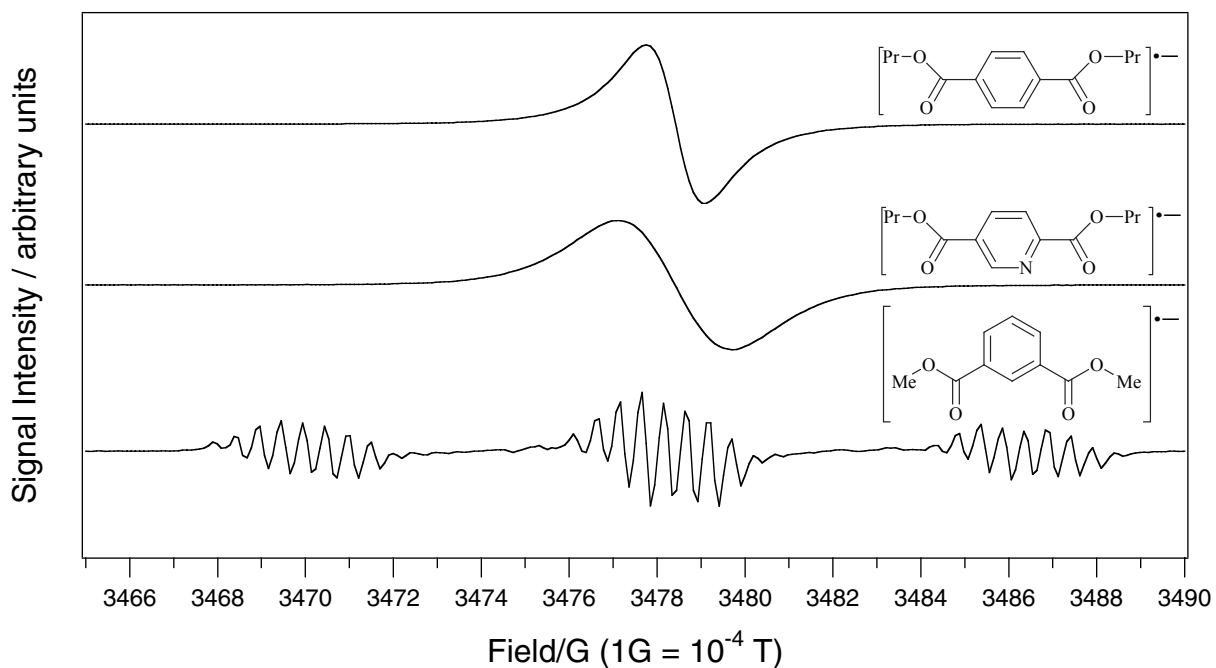

**ESI.** First derivative EPR spectra of radical anions obtained by reducing the neutral starting materials by one-electron in a two compartment controlled potential electrolysis cell at room temperature under nitrogen (see Experimental Section) then transferring an aliquot of the solution into a silica flat cell. In each case the concentration of the starting material was 20 mM with 0.1 M  $\text{Bu}_4\text{NPF}_6$  as the supporting electrolyte. The modulation amplitude = 0.1 G, microwave frequency = 9.757 GHz and microwave power = 2 mW.
